# Supplementary material for: Protein arginine methyltransferase 1 is required for maintenance of normal adult hematopoiesis
Source: PubMed Central journal article supplement (PMC6909962; doi:10.7150/ijbs.38859), 2019-10-23

Figure S1.

Analysis of peripheral blood cell RBC and Hb counts at 0, 4, 6, 8, 10 and 12 weeks after plpC injection are shown. \* $p < 0.05$ , \*\*\* $p < 0.001$ . p values were determined by two-way ANOVA.

Figure S2.

Kaplan-Meier survival curve of PRMT1<sup>ff</sup> ( $n=6$ ), and PRMT1<sup>ff</sup>/Mx1-CRE mice ( $n=8$ ).

Figure S3.

Analysis of peripheral blood cell WBC counts at 4 weeks after plpC injection are shown ( $n=5$ ).

# Supplementary figure S1

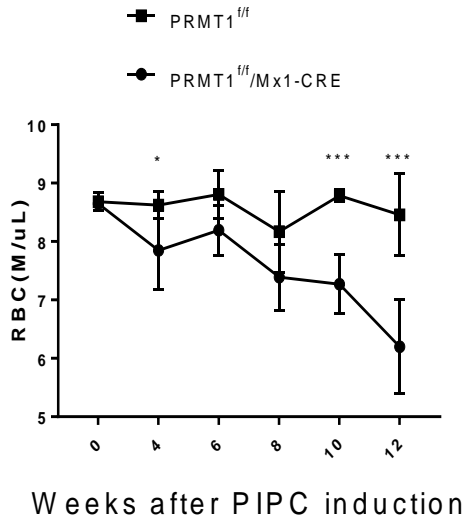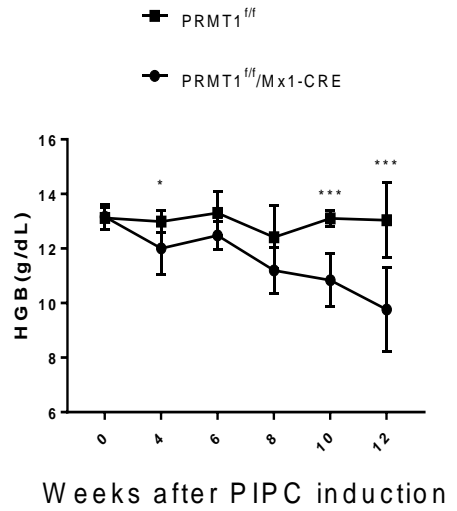

## Supplementary figure S2

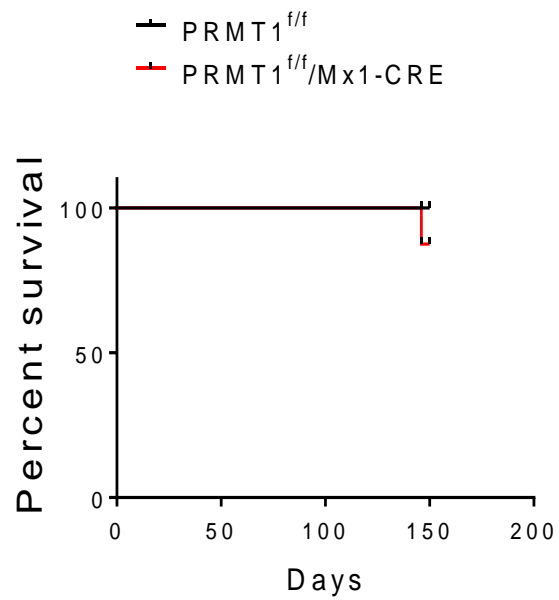

### Supplementary figure S3

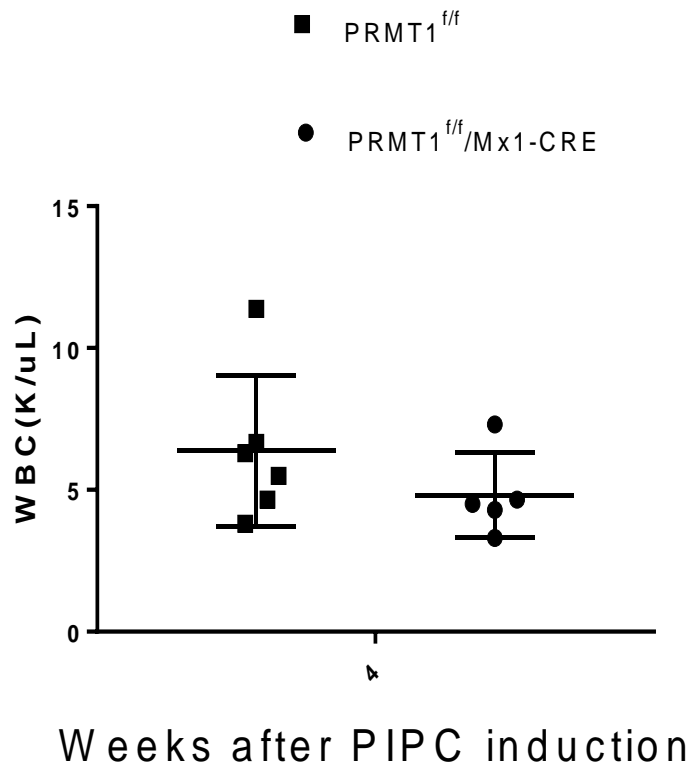

Supplement: ijbsv15p2763s1.pdf [file ijbsv15p2763s1.pdf]
